# Supplementary material for: Identifying genetic lineages through shape: An example in a cosmopolitan marine turtle species using geometric morphometrics
Source: PLoS One. 2019 Oct 7;14(10):e0223587. doi: 10.1371/journal.pone.0223587 (PMC6779254; doi:10.1371/journal.pone.0223587)
Supplement: S1 Table — (XLSX) [file pone.0223587.s001.xlsx]

## Sheet: Hoja1
Foraging ground	Specific location	Year	Individual	Haplotype origin
Chile	Bahía Salado	2014	EP_BL_01_13_08.01_AT	Eastern Pacific
Chile	Bahía Salado	2014	EP_BL_01_13_08.03_AT	Eastern Pacific
Chile	Bahía Salado	2014	EP_BL_01_13_08.05_AT	Eastern Pacific
Chile	Bahía Salado	2014	EP_BL_01_13_08.07_AT	Eastern Pacific
Chile	Bahía Salado	2014	EP_BL_01_13_00.06_AT	Eastern Pacific
Chile	Bahía Salado	2018	EP_BL_02_18_00.01_AT	Eastern Pacific
Chile	Bahía Salado	2018	EP_BL_02_18_08.23_AT	Eastern Pacific
Chile	Bahía Salado	2018	EP_BL_02_18_08.28_AT	Eastern Pacific
Chile	Bahía Salado	2018	EP_BL_02_18_00.05_AT	Eastern Pacific
Costa Rica	Bahía Matapalito	2013	EP_BL_08_13_00.10_CR	Eastern Pacific
Costa Rica	Bahía Matapalito	2014	EP_BL_08_14_00.13_CR	Eastern Pacific
Costa Rica	Bahía Matapalito	2015	EP_BL_10_15_00.17_CR	Eastern Pacific
Costa Rica	Bahía Matapalito	2015	EP_BL_10_15_00.18_CR	Eastern Pacific
Costa Rica	Bahía Matapalito	2016	EP_BL_01_16_00.20_CR	Eastern Pacific
Costa Rica	Bahía Matapalito	2016	EP_BL_01_16_00.22_CR	Eastern Pacific
Costa Rica	Bahía Matapalito	2016	EP_BL_01_16_00.23_CR	Eastern Pacific
Costa Rica	Bahía Matapalito	2016	EP_BL_02_17_00.25_CR	Eastern Pacific
Costa Rica	Bahía Matapalito	2016	EP_BL_12_16_00.35_CR	Eastern Pacific
Costa Rica	Bahía Matapalito	2017	EP_BL_01_17_00.38_CR	Eastern Pacific
Costa Rica	Bahía Matapalito	2017	EP_BL_02_17_00.46_CR	Eastern Pacific
Costa Rica	Bahía Matapalito	2017	EP_BL_02_17_00.49_CR	Eastern Pacific
Costa Rica	Bahía Matapalito	2017	EP_BL_02_17_00.50_CR	Eastern Pacific
Costa Rica	Bahía Matapalito	2017	EP_BL_03_17_00.53_CR	Eastern Pacific
Costa Rica	Bahía Matapalito	2017	EP_BL_07_17_00.90_CR	Eastern Pacific
Costa Rica	Bahía Matapalito	2017	EP_BL_08_17_00.96_CR	Eastern Pacific
Costa Rica	Bahía Matapalito	2017	EP_BL_08_17_00.97_CR	Eastern Pacific
Costa Rica	Bahía Matapalito	2017	EP_BL_08_17_01.02_CR	Eastern Pacific
Costa Rica	Bahía Matapalito	2017	EP_BL_09_17_01.03_CR	Eastern Pacific
Costa Rica	Bahía Matapalito	2017	EP_BL_09_17_01.04_CR	Eastern Pacific
Costa Rica	Bahía Salinas	2017	EP_BL_02_17_00.43_CR	Eastern Pacific
Costa Rica	Bahía Salinas	2017	EP_BL_07_17_00.86_CR	Eastern Pacific
Galapagos, Ecuador	Bahia Elizabeth	2004	EP_BL_04_00_73.74_GA	Eastern Pacific
Galapagos, Ecuador	Bahia Elizabeth	2004	EP_BL_11_04_93.92_GA	Eastern Pacific
Galapagos, Ecuador	Caleta Derek	2004	EP_BL_05_57_66.48_GA	Eastern Pacific
Galapagos, Ecuador	Caleta Derek	2004	EP_BL_04_00_23.24_GA	Eastern Pacific
Galapagos, Ecuador	Caleta Derek	2004	EP_BL_04_00_41.42_GA	Eastern Pacific
Galapagos, Ecuador	Caleta Derek	2004	EP_BL_04_00_60.58_GA	Eastern Pacific
Galapagos, Ecuador	Caleta Derek	2004	EP_BL_05_00_65.66_GA	Eastern Pacific
Galapagos, Ecuador	Caleta Derek	2004	EP_BL_04_00_67.68_GA	Eastern Pacific
Galapagos, Ecuador	Caleta Derek	2004	EP_BL_04_11_61.21_GA	Eastern Pacific
Galapagos, Ecuador	Caleta Derek	2004	EP_BL_04_12_21.47_GA	Eastern Pacific
Galapagos, Ecuador	Caleta Derek	2004	EP_BL_04_13_11.32_GA	Eastern Pacific
Galapagos, Ecuador	Caleta Derek	2004	EP_BL_04_17_21.71_GA	Eastern Pacific
Galapagos, Ecuador	Caleta Derek	2004	EP_BL_04_18_41.85_GA	Eastern Pacific
Galapagos, Ecuador	Caleta Derek	2004	EP_BL_04_20_01.01_GA	Eastern Pacific
Galapagos, Ecuador	Caleta Derek	2004	EP_BL_04_30_33.04_GA	Eastern Pacific
Galapagos, Ecuador	Caleta Derek	2004	EP_BL_04_36_43.61_GA	Eastern Pacific
Galapagos, Ecuador	Caleta Derek	2004	EP_BL_04_51_75.89_GA	Eastern Pacific
Galapagos, Ecuador	Caleta Derek	2004	EP_BL_04_00_60.61_GA	Eastern Pacific
Galapagos, Ecuador	Punta Espinoza	2004	EP_BL_04_29_42.95_GA	Eastern Pacific
Galapagos, Ecuador	Punta Espinoza	2004	EP_BL_04_40_14.02_GA	Eastern Pacific
Galapagos, Ecuador	Punta Espinoza	2004	EP_BL_04_40_34.04_GA	Eastern Pacific
Galapagos, Ecuador	Punta Espinoza	2004	EP_BL_04_40_54.06_GA	Eastern Pacific
Galapagos, Ecuador	Punta Espinoza	2004	EP_BL_04_40_74.08_GA	Eastern Pacific
Galapagos, Ecuador	Punta Espinoza	2004	EP_BL_04_41_04.12_GA	Eastern Pacific
Galapagos, Ecuador	Punta Espinoza	2004	EP_BL_04_41_44.13_GA	Eastern Pacific
Galapagos, Ecuador	Punta Espinoza	2004	EP_BL_04_43_54.34_GA	Eastern Pacific
Galapagos, Ecuador	Punta Espinoza	2004	EP_BL_04_43_74.36_GA	Eastern Pacific
Galapagos, Ecuador	Punta Espinoza	2004	EP_BL_04_44_04.41_GA	Eastern Pacific
Galapagos, Ecuador	Punta Espinoza	2004	EP_BL_04_44_64.47_GA	Eastern Pacific
Galapagos, Ecuador	Punta Espinoza	2004	EP_BL_05_45_64.55_GA	Eastern Pacific
Galapagos, Ecuador	Punta Espinoza	2004	EP_BL_04_46_04.59_GA	Eastern Pacific
Galapagos, Ecuador	Punta Espinoza	2004	EP_BL_04_46_34.64_GA	Eastern Pacific
Galapagos, Ecuador	Punta Espinoza	2004	EP_BL_04_46_74.68_GA	Eastern Pacific
Galapagos, Ecuador	Punta Espinoza	2004	EP_BL_04_52_35.24_GA	Eastern Pacific
Galapagos, Ecuador	Punta Espinoza	2004	EP_BL_04_53_55.36_GA	Eastern Pacific
Galapagos, Ecuador	Punta Espinoza	2004	EP_BL_04_56_45.75_GA	Eastern Pacific
Galapagos, Ecuador	Punta Espinoza	2004	EP_BL_04_58_35.84_GA	Eastern Pacific
Galapagos, Ecuador	Punta Espinoza	2004	EP_BL_04_58_65.87_GA	Eastern Pacific
Galapagos, Ecuador	Punta Espinoza	2004	EP_BL_04_59_65.99_GA	Eastern Pacific
Galapagos, Ecuador	Punta Espinoza	2004	EP_BL_04_60_86.07_GA	Eastern Pacific
Galapagos, Ecuador	Punta Espinoza	2004	EP_BL_04_61_16.12_GA	Eastern Pacific
Galapagos, Ecuador	Punta Espinoza	2004	EP_BL_04_61_46.13_GA	Eastern Pacific
Galapagos, Ecuador	Punta Espinoza	2004	EP_BL_04_61_56.16_GA	Eastern Pacific
Galapagos, Ecuador	Punta Espinoza	2004	EP_BL_04_61_76.22_GA	Eastern Pacific
Galapagos, Ecuador	Punta Espinoza	2004	EP_BL_04_61_86.19_GA	Eastern Pacific
Galapagos, Ecuador	Punta Espinoza	2004	EP_BL_04_62_16.22_GA	Eastern Pacific
Galapagos, Ecuador	Caleta Derek	2005	EP_BL_05_47_14.72_GA	Eastern Pacific
Galapagos, Ecuador	Caleta Derek	2005	EP_BL_05_47_54.76_GA	Eastern Pacific
Galapagos, Ecuador	Caleta Derek	2005	EP_BL_05_48_94.90_GA	Eastern Pacific
Galapagos, Ecuador	Caleta Derek	2005	EP_BL_05_49_24.91_GA	Eastern Pacific
Galapagos, Ecuador	Caleta Derek	2005	EP_BL_05_49_74.98_GA	Eastern Pacific
Galapagos, Ecuador	Caleta Derek	2005	EP_BL_05_49_95.00_GA	Eastern Pacific
Galapagos, Ecuador	Caleta Derek	2005	EP_BL_05_63_26.33_GA	Eastern Pacific
Galapagos, Ecuador	Caleta Derek	2005	EP_BL_05_63_46.35_GA	Eastern Pacific
Galapagos, Ecuador	Caleta Derek	2005	EP_BL_05_63_86.39_GA	Eastern Pacific
Galapagos, Ecuador	Caleta Derek	2005	EP_BL_05_64_06.41_GA	Eastern Pacific
Galapagos, Ecuador	Caleta Derek	2005	EP_BL_05_64_46.45_GA	Eastern Pacific
Galapagos, Ecuador	Caleta Derek	2005	EP_BL_05_65_66.47_GA	Eastern Pacific
Galapagos, Ecuador	Caleta Derek	2005	EP_BL_05_71_57.16_GA	Eastern Pacific
Galapagos, Ecuador	Caleta Derek	2005	EP_BL_05_71_77.18_GA	Eastern Pacific
Galapagos, Ecuador	Caleta Derek	2005	EP_BL_05_73_97.40_GA	Eastern Pacific
Galapagos, Ecuador	Caleta Derek	2005	EP_BL_05_00_66.67_GA	Eastern Pacific
Galapagos, Ecuador	Punta Espinoza	2005	EP_BL_05_75_07.63_GA	Eastern Pacific
Galapagos, Ecuador	Punta Espinoza	2005	EP_BL_05_79_57.96_GA	Eastern Pacific
Galapagos, Ecuador	Punta Espinoza	2005	EP_BL_05_79_77.98_GA	Eastern Pacific
Galapagos, Ecuador	Punta Espinoza	2005	EP_BL_05_86_08.61_GA	Eastern Pacific
Galapagos, Ecuador	Punta Espinoza	2005	EP_BL_05_87_08.71_GA	Eastern Pacific
Galapagos, Ecuador	Punta Espinoza	2005	EP_BL_05_87_48.75_GA	Eastern Pacific
Galapagos, Ecuador	Punta Espinoza	2005	EP_BL_04_46_14.62_GA	Eastern Pacific
New Zealand	Whangarei Harbour	2007	EP_BL_00_00_00.30_NZ	Eastern Pacific
New Zealand	Waitemata Harbour	2007	EP_BL_00_00_00.47_NZ	Eastern Pacific
New Zealand	90 Mile Beach	2012	EP_BL_00_00_02.18_NZ	Eastern Pacific
New Zealand	Waitemata Harbour	2012	EP_BL_00_00_02.67_NZ	Eastern Pacific
New Zealand	Ohope	2017	EP_BL_00_00_06.65_NZ	Eastern Pacific
Costa Rica	Bahía Matapalito	2012	WP_YE_12_12_00.03_CR	Western Pacific
Costa Rica	Bahía Matapalito	2013	WP_YE_05_13_00.04_CR	Western Pacific
Costa Rica	Bahía Matapalito	2015	WP_YE_08_15_00.14_CR	Western Pacific
Costa Rica	Bahía Matapalito	2016	WP_YE_01_16_00.21_CR	Western Pacific
Costa Rica	Bahía Matapalito	2016	WP_YE_01_16_00.24_CR	Western Pacific
Costa Rica	Bahía Matapalito	2016	WP_YE_06_16_00.26_CR	Western Pacific
Costa Rica	Bahía Matapalito	2016	WP_YE_07_16_00.27_CR	Western Pacific
Costa Rica	Bahía Matapalito	2016	WP_YE_10_16_00.29_CR	Western Pacific
Costa Rica	Bahía Matapalito	2016	WP_YE_10_16_00.30_CR	Western Pacific
Costa Rica	Bahía Matapalito	2016	WP_YE_10_16_00.32_CR	Western Pacific
Costa Rica	Bahía Matapalito	2016	WP_YE_10_16_00.33_CR	Western Pacific
Costa Rica	Bahía Matapalito	2016	WP_YE_10_16_00.34_CR	Western Pacific
Costa Rica	Bahía Matapalito	2017	WP_YE_01_17_00.36_CR	Western Pacific
Costa Rica	Bahía Matapalito	2017	WP_YE_01_17_00.39_CR	Western Pacific
Costa Rica	Bahía Matapalito	2017	WP_YE_02_17_00.48_CR	Western Pacific
Costa Rica	Bahía Matapalito	2017	WP_YE_07_17_00.91_CR	Western Pacific
Costa Rica	Bahía Matapalito	2017	WP_YE_11_17_01.15_CR	Western Pacific
Costa Rica	Bahía Matapalito	2017	WP_YE_11_17_01.18_CR	Western Pacific
Costa Rica	Bahía Matapalito	2017	WP_YE_12_17_01.23_CR	Western Pacific
Costa Rica	Bahía Salinas	2017	WP_YE_07_17_00.94_CR	Western Pacific
Galapagos, Ecuador	Bahía Elizabeth	2004	WP_YE_04_13_23.45_GA	Western Pacific
Galapagos, Ecuador	Caleta Derek	2004	WP_YE_04_00_28.30_GA	Western Pacific
Galapagos, Ecuador	Caleta Derek	2004	WP_YE_04_00_63.62_GA	Western Pacific
Galapagos, Ecuador	Caleta Derek	2004	WP_YE_04_00_16.27_GA	Western Pacific
Galapagos, Ecuador	Caleta Derek	2004	WP_YE_04_00_21.28_GA	Western Pacific
Galapagos, Ecuador	Caleta Derek	2004	WP_YE_04_00_29.30_GA	Western Pacific
Galapagos, Ecuador	Caleta Derek	2004	WP_YE_04_00_49.50_GA	Western Pacific
Galapagos, Ecuador	Caleta Derek	2004	WP_YE_04_35_43.53_GA	Western Pacific
Galapagos, Ecuador	Punta Espinoza	2004	WP_YE_04_44_14.42_GA	Western Pacific
Galapagos, Ecuador	Caleta Derek	2005	WP_YE_05_48_74.88_GA	Western Pacific
New Zealand	Waitemata Harbour	2007	WP_BL_00_00_00.33_NZ	Western Pacific
New Zealand	90 Mile Beach	2009	WP_BL_00_00_00.49_NZ	Western Pacific
New Zealand	Muriwai Beach	2010	WP_BL_00_00_00.95_NZ	Western Pacific
New Zealand	Whangarei Harbour	2010	WP_BL_00_00_01.09_NZ	Western Pacific
New Zealand	Karekare Beach	2011	WP_BL_00_00_01.28_NZ	Western Pacific
New Zealand	Great Barrier Island	2011	WP_BL_00_00_01.37_NZ	Western Pacific
New Zealand	Rarawa Beach	2011	WP_BL_00_00_01.46_NZ	Western Pacific
New Zealand	Papamoa Beach	2012	WP_BL_00_00_02.17_NZ	Western Pacific
New Zealand	Te Arai Beach	2012	WP_BL_00_00_02.83_NZ	Western Pacific
New Zealand	Dargaville	2012	WP_BL_00_00_02.88_NZ	Western Pacific
New Zealand	90 Mile Beach	2012	WP_BL_00_00_03.14_NZ	Western Pacific
New Zealand	90 Mile Beach	2012	WP_BL_00_00_03.17_NZ	Western Pacific
New Zealand	Karikari Peninsula	2011	WP_BL_00_00_03.63_NZ	Western Pacific
New Zealand	Waitemata Harbour	2012	WP_BL_00_00_03.65_NZ	Western Pacific
New Zealand	90 Mile Beach	2013	WP_BL_00_00_04.48_NZ	Western Pacific
New Zealand	Teal Bay	2012	WP_BL_00_00_04.80_NZ	Western Pacific
New Zealand	Matai Bay	2016	WP_BL_00_00_06.12_NZ	Western Pacific
New Zealand	Waitemata Harbour	2017	WP_BL_00_00_06.48_NZ	Western Pacific
New Zealand	Great Exhibition Bay	2017	WP_BL_00_00_06.59_NZ	Western Pacific
New Zealand	Whangarei Harbour	2017	WP_BL_00_00_06.91_NZ	Western Pacific
Uruguay	ACMP Cerro Verde	2012	AT_06_01_12_12.50_CV	Atlantic
Uruguay	ACMP Cerro Verde	2012	AT_06_01_12_13.19_CV	Atlantic
Uruguay	ACMP Cerro Verde	2012	AT_06_01_12_13.36_CV	Atlantic
Uruguay	ACMP Cerro Verde	2012	AT_06_01_12_13.38_CV	Atlantic
Uruguay	ACMP Cerro Verde	2012	AT_06_01_12_16.46_CV	Atlantic
Uruguay	ACMP Cerro Verde	2012	AT_06_01_12_17.05_CV	Atlantic
Uruguay	ACMP Cerro Verde	2012	AT_06_01_12_17.06_CV	Atlantic
Uruguay	ACMP Cerro Verde	2012	AT_06_01_12_17.42_CV	Atlantic
Uruguay	ACMP Cerro Verde	2012	AT_06_01_12_17.44_CV	Atlantic
Uruguay	ACMP Cerro Verde	2012	AT_06_01_12_18.26_CV	Atlantic
Uruguay	ACMP Cerro Verde	2012	AT_13_01_12_12.20_CV	Atlantic
Uruguay	ACMP Cerro Verde	2012	AT_13_01_12_12.23_CV	Atlantic
Uruguay	ACMP Cerro Verde	2012	AT_14_01_12_12.30_PE	Atlantic
Uruguay	ACMP Cerro Verde	2012	AT_14_01_12_12.42_PE	Atlantic
Uruguay	ACMP Cerro Verde	2012	AT_14_01_12_12.44_PE	Atlantic
Uruguay	ACMP Cerro Verde	2012	AT_14_01_12_14.26_PE	Atlantic
Uruguay	ACMP Cerro Verde	2013	AT_05_02_13_12.12_CV	Atlantic
Uruguay	ACMP Cerro Verde	2013	AT_05_02_13_12.32_CV	Atlantic
Uruguay	ACMP Cerro Verde	2013	AT_08_02_13_12.27_CV	Atlantic
Uruguay	ACMP Cerro Verde	2013	AT_08_02_13_12.32_CV	Atlantic
Uruguay	ACMP Cerro Verde	2013	AT_08_02_13_12.52_CV	Atlantic
Uruguay	ACMP Cerro Verde	2013	AT_08_02_13_13.09_CV	Atlantic
Uruguay	ACMP Cerro Verde	2013	AT_08_02_13_13.14_CV	Atlantic
Uruguay	ACMP Cerro Verde	2013	AT_08_02_13_13.22_CV	Atlantic
Uruguay	ACMP Cerro Verde	2013	AT_08_02_13_14.15_CV	Atlantic
Uruguay	ACMP Cerro Verde	2013	AT_08_02_13_14.21_CV	Atlantic
Uruguay	ACMP Cerro Verde	2013	AT_08_02_13_14.41_CV	Atlantic
Uruguay	ACMP Cerro Verde	2013	AT_09_01_13_11.38_CV	Atlantic
Uruguay	ACMP Cerro Verde	2013	AT_09_01_13_11.44_CV	Atlantic
Uruguay	ACMP Cerro Verde	2013	AT_09_01_13_12.21_CV	Atlantic
Uruguay	ACMP Cerro Verde	2013	AT_09_01_13_12.22_CV	Atlantic
Uruguay	ACMP Cerro Verde	2013	AT_09_01_13_12.42_CV	Atlantic
Uruguay	ACMP Cerro Verde	2013	AT_09_01_13_13.34_CV	Atlantic
Uruguay	ACMP Cerro Verde	2013	AT_09_01_13_13.59_CV	Atlantic
Uruguay	ACMP Cerro Verde	2013	AT_09_01_13_15.11_CV	Atlantic
Uruguay	ACMP Cerro Verde	2013	AT_09_01_13_15.14_CV	Atlantic
Uruguay	ACMP Cerro Verde	2013	AT_09_01_13_15.16_CV	Atlantic
Uruguay	ACMP Cerro Verde	2013	AT_09_01_13_15.30_CV	Atlantic
Uruguay	ACMP Cerro Verde	2013	AT_09_05_13_16.16_CV	Atlantic
Uruguay	ACMP Cerro Verde	2013	AT_12_02_13_13.41_CV	Atlantic
Uruguay	ACMP Cerro Verde	2013	AT_12_02_13_13.55_CV	Atlantic
Uruguay	ACMP Cerro Verde	2013	AT_12_02_13_14.07_CV	Atlantic
Uruguay	ACMP Cerro Verde	2013	AT_12_02_13_14.11_CV	Atlantic
Uruguay	ACMP Cerro Verde	2013	AT_12_02_13_14.32_CV	Atlantic
Uruguay	ACMP Cerro Verde	2013	AT_12_02_13_14.38_CV	Atlantic
Uruguay	ACMP Cerro Verde	2013	AT_17_02_13_12.32_CV	Atlantic
Uruguay	ACMP Cerro Verde	2013	AT_17_02_13_13.13_CV	Atlantic
Uruguay	ACMP Cerro Verde	2013	AT_17_02_13_14.05_CV	Atlantic
Uruguay	ACMP Cerro Verde	2013	AT_17_02_13_14.13_CV	Atlantic
Uruguay	ACMP Cerro Verde	2013	AT_17_02_13_15.02_CV	Atlantic
Uruguay	ACMP Cerro Verde	2013	AT_17_02_13_15.05_CV	Atlantic
Uruguay	ACMP Cerro Verde	2013	AT_24_01_13_12.45_CV	Atlantic
Uruguay	ACMP Cerro Verde	2013	AT_23_04_13_11.43_CR	Atlantic
Uruguay	ACMP Cerro Verde	2013	AT_23_04_13_11.58_CR	Atlantic
Uruguay	ACMP Cerro Verde	2013	AT_23_03_13_11.20_EN	Atlantic
Uruguay	ACMP Cerro Verde	2013	AT_23_03_13_13.08_EN	Atlantic
Uruguay	ACMP Cerro Verde	2013	AT_23_03_13_13.20_EN	Atlantic
Uruguay	ACMP Cerro Verde	2013	AT_23_03_13_13.42_EN	Atlantic
Uruguay	ACMP Cerro Verde	2013	AT_23_03_13_14.52_EN	Atlantic
Uruguay	ACMP Cerro Verde	2013	AT_24_03_13_15.04_EN	Atlantic
Uruguay	ACMP Cerro Verde	2013	AT_25_03_13_11.47_EN	Atlantic
Uruguay	ACMP Cerro Verde	2013	AT_25_03_13_11.56_EN	Atlantic
Uruguay	ACMP Cerro Verde	2013	AT_21_01_13_20.05_IC	Atlantic
Uruguay	ACMP Cerro Verde	2013	AT_29_01_13_20.00_IC	Atlantic
Uruguay	ACMP Cerro Verde	2013	AT_01_01_13_10.02_IV	Atlantic
Uruguay	ACMP Cerro Verde	2013	AT_01_03_13_10.35_IV	Atlantic
Uruguay	ACMP Cerro Verde	2013	AT_01_03_13_11.02_IV	Atlantic
Uruguay	ACMP Cerro Verde	2013	AT_01_03_13_11.10_IV	Atlantic
Uruguay	ACMP Cerro Verde	2013	AT_01_03_13_11.15_IV	Atlantic
Uruguay	ACMP Cerro Verde	2013	AT_01_03_13_11.25_IV	Atlantic
Uruguay	ACMP Cerro Verde	2013	AT_01_03_13_11.35_IV	Atlantic
Uruguay	ACMP Cerro Verde	2013	AT_07_03_13_12.26_IV	Atlantic
Uruguay	ACMP Cerro Verde	2013	AT_07_03_13_13.55_IV	Atlantic
Uruguay	ACMP Cerro Verde	2013	AT_07_03_13_14.10_IV	Atlantic
Uruguay	ACMP Cerro Verde	2013	AT_08_03_13_13.20_IV	Atlantic
Uruguay	ACMP Cerro Verde	2013	AT_08_03_13_13.40_IV	Atlantic
Uruguay	ACMP Cerro Verde	2013	AT_08_03_13_15.05_IV	Atlantic
Uruguay	ACMP Cerro Verde	2013	AT_08_03_13_15.10_IV	Atlantic
Uruguay	ACMP Cerro Verde	2013	AT_08_03_13_15.20_IV	Atlantic
Uruguay	ACMP Cerro Verde	2013	AT_08_04_13_10.30_IV	Atlantic
Uruguay	ACMP Cerro Verde	2013	AT_08_04_13_11.45_IV	Atlantic
Uruguay	ACMP Cerro Verde	2013	AT_09_04_13_12.00_IV	Atlantic
Uruguay	ACMP Cerro Verde	2013	AT_09_04_13_12.30_IV	Atlantic
Uruguay	ACMP Cerro Verde	2013	AT_09_04_13_13.05_IV	Atlantic
Uruguay	ACMP Cerro Verde	2013	AT_09_04_13_13.15_IV	Atlantic
Uruguay	ACMP Cerro Verde	2013	AT_09_04_13_13.20_IV	Atlantic
Uruguay	ACMP Cerro Verde	2013	AT_09_04_13_14.10_IV	Atlantic
Uruguay	ACMP Cerro Verde	2013	AT_09_04_13_15.15_IV	Atlantic
Uruguay	ACMP Cerro Verde	2013	AT_19_04_13_15.45_IV	Atlantic
Uruguay	ACMP Cerro Verde	2013	AT_19_04_13_15.50_IV	Atlantic
Uruguay	ACMP Cerro Verde	2013	AT_19_04_13_15.55_IV	Atlantic
Uruguay	ACMP Cerro Verde	2013	AT_19_04_13_16.00_IV	Atlantic
Uruguay	ACMP Cerro Verde	2013	AT_19_04_13_16.03_IV	Atlantic
Uruguay	ACMP Cerro Verde	2013	AT_19_04_13_16.20_IV	Atlantic
Uruguay	ACMP Cerro Verde	2013	AT_19_04_13_16.25_IV	Atlantic
Uruguay	ACMP Cerro Verde	2013	AT_19_04_13_16.30_IV	Atlantic
Uruguay	ACMP Cerro Verde	2013	AT_19_04_13_16.35_IV	Atlantic
Uruguay	ACMP Cerro Verde	2013	AT_19_04_13_16.40_IV	Atlantic
Uruguay	ACMP Cerro Verde	2013	AT_31_03_13_14.10_IV	Atlantic
Uruguay	ACMP Cerro Verde	2013	AT_31_03_13_14.15_IV	Atlantic
Uruguay	ACMP Cerro Verde	2013	AT_31_03_13_14.35_IV	Atlantic
Uruguay	ACMP Cerro Verde	2013	AT_31_03_13_14.40_IV	Atlantic
Uruguay	ACMP Cerro Verde	2013	AT_31_03_13_15.20_IV	Atlantic
Uruguay	ACMP Cerro Verde	2013	AT_31_03_13_15.41_IV	Atlantic
Uruguay	ACMP Cerro Verde	2013	AT_04_03_13_11.31_PE	Atlantic
Uruguay	ACMP Cerro Verde	2013	AT_04_03_13_12.07_PE	Atlantic
Uruguay	ACMP Cerro Verde	2013	AT_05_01_13_11.52_PE	Atlantic
Uruguay	ACMP Cerro Verde	2013	AT_05_01_13_13.59_PE	Atlantic
Uruguay	ACMP Cerro Verde	2013	AT_06_04_13_11.20_PE	Atlantic
Uruguay	ACMP Cerro Verde	2013	AT_06_04_13_11.25_CV	Atlantic
Uruguay	ACMP Cerro Verde	2013	AT_06_04_13_11.40_CV	Atlantic
Uruguay	ACMP Cerro Verde	2013	AT_06_05_13_15.35_PE	Atlantic
Uruguay	ACMP Cerro Verde	2013	AT_07_01_13_14.28_PE	Atlantic
Uruguay	ACMP Cerro Verde	2013	AT_10_05_13_14.43_PE	Atlantic
Uruguay	ACMP Cerro Verde	2013	AT_11_01_12_13.29_PE	Atlantic
Uruguay	ACMP Cerro Verde	2013	AT_11_01_12_13.42_PE	Atlantic
Uruguay	ACMP Cerro Verde	2013	AT_11_03_13_10.44_PE	Atlantic
Uruguay	ACMP Cerro Verde	2013	AT_11_03_13_11.07_PE	Atlantic
Uruguay	ACMP Cerro Verde	2013	AT_11_03_13_12.28_PE	Atlantic
Uruguay	ACMP Cerro Verde	2013	AT_11_03_13_12.29_PE	Atlantic
Uruguay	ACMP Cerro Verde	2013	AT_11_03_13_14.25_PE	Atlantic
Uruguay	ACMP Cerro Verde	2013	AT_11_03_13_14.59_PE	Atlantic
Uruguay	ACMP Cerro Verde	2013	AT_11_03_13_10.15_PE	Atlantic
Uruguay	ACMP Cerro Verde	2013	AT_14_01_13_11.44_PE	Atlantic
Uruguay	ACMP Cerro Verde	2013	AT_14_01_13_12.30_PE	Atlantic
Uruguay	ACMP Cerro Verde	2013	AT_15_03_13_11.00_PE	Atlantic
Uruguay	ACMP Cerro Verde	2013	AT_15_03_13_15.00_PE	Atlantic
Uruguay	ACMP Cerro Verde	2013	AT_17_01_13_13.59_PE	Atlantic
Uruguay	ACMP Cerro Verde	2013	AT_17_01_13_11.39_PE	Atlantic
Uruguay	ACMP Cerro Verde	2013	AT_17_01_13_12.33_PE	Atlantic
Uruguay	ACMP Cerro Verde	2013	AT_18_01_13_11.15_PE	Atlantic
Uruguay	ACMP Cerro Verde	2013	AT_18_01_13_11.20_PE	Atlantic
Uruguay	ACMP Cerro Verde	2013	AT_18_01_13_11.45_PE	Atlantic
Uruguay	ACMP Cerro Verde	2013	AT_18_01_13_13.10_PE	Atlantic
Uruguay	ACMP Cerro Verde	2013	AT_18_01_13_15.08_PE	Atlantic
Uruguay	ACMP Cerro Verde	2013	AT_18_01_13_15.25_PE	Atlantic
Uruguay	ACMP Cerro Verde	2013	AT_18_04_13_11.23_PE	Atlantic
Uruguay	ACMP Cerro Verde	2013	AT_25_02_13_11.59_PE	Atlantic
Uruguay	ACMP Cerro Verde	2013	AT_25_02_13_12.05_PE	Atlantic
Uruguay	ACMP Cerro Verde	2013	AT_25_02_13_12.57_PE	Atlantic
Uruguay	ACMP Cerro Verde	2013	AT_25_02_13_14.20_PE	Atlantic
Uruguay	ACMP Cerro Verde	2013	AT_26_02_13_13.20_PE	Atlantic
Uruguay	ACMP Cerro Verde	2013	AT_26_02_13_14.00_PE	Atlantic
Uruguay	ACMP Cerro Verde	2013	AT_26_02_13_14.18_PE	Atlantic
Uruguay	ACMP Cerro Verde	2013	AT_26_02_13_15.34_PE	Atlantic
Uruguay	ACMP Cerro Verde	2013	AT_26_02_13_15.47_PE	Atlantic
Uruguay	ACMP Cerro Verde	2013	AT_26_02_13_16.36_PE	Atlantic
Uruguay	ACMP Cerro Verde	2013	AT_27_03_13_11.20_PE	Atlantic
Uruguay	ACMP Cerro Verde	2013	AT_27_03_13_12.21_PE	Atlantic
Uruguay	ACMP Cerro Verde	2013	AT_27_03_13_12.32_PE	Atlantic
Uruguay	ACMP Cerro Verde	2013	AT_28_01_13_13.07_PE	Atlantic
Uruguay	Playa Verde, Maldonado	2013	AT_01_05_13_16.10_PV	Atlantic
Uruguay	Playa Verde, Maldonado	2013	AT_01_05_13_16.20_PV	Atlantic
Uruguay	Playa Verde, Maldonado	2013	AT_01_05_13_16.30_PV	Atlantic
Uruguay	Playa Verde, Maldonado	2013	AT_01_05_13_16.40_PV	Atlantic
Uruguay	ACMP Cerro Verde	2014	AT_06_12_14_17.00_CA	Atlantic
Uruguay	ACMP Cerro Verde	2014	AT_19_12_14_17.30_CA	Atlantic
Uruguay	ACMP Cerro Verde	2014	AT_28_12_14_13.33_CV	Atlantic
Uruguay	ACMP Cerro Verde	2014	AT_28_12_14_13.40_CV	Atlantic
Uruguay	ACMP Cerro Verde	2014	AT_28_12_14_14.20_CV	Atlantic
Uruguay	ACMP Cerro Verde	2014	AT_28_12_14_14.43_CV	Atlantic
Uruguay	ACMP Cerro Verde	2014	AT_28_12_14_15.18_CV	Atlantic
Uruguay	ACMP Cerro Verde	2014	AT_19_12_14_16.15_IV	Atlantic
Uruguay	ACMP Cerro Verde	2014	AT_12_12_14_11.30_PE	Atlantic
Uruguay	ACMP Cerro Verde	2015	AT_18_01_15_19.00_CA	Atlantic
Uruguay	ACMP Cerro Verde	2015	AT_14_02_15_12.50_CV	Atlantic
Uruguay	ACMP Cerro Verde	2015	AT_14_02_15_15.48_CV	Atlantic
Uruguay	ACMP Cerro Verde	2015	AT_24_02_15_17.07_CV	Atlantic
Uruguay	ACMP Cerro Verde	2015	AT_25_02_15_14.31_CV	Atlantic
Uruguay	ACMP Cerro Verde	2015	AT_26_01_15_17.45_CR	Atlantic
Uruguay	ACMP Cerro Verde	2015	AT_07_01_15_19.15_HO	Atlantic
Uruguay	ACMP Cerro Verde	2015	AT_10_01_15_14.10_IV	Atlantic
Uruguay	ACMP Cerro Verde	2015	AT_10_01_15_14.15_IV	Atlantic
Uruguay	ACMP Cerro Verde	2015	AT_10_01_15_14.30_IV	Atlantic
Uruguay	ACMP Cerro Verde	2015	AT_10_01_15_15.30_IV	Atlantic
Uruguay	ACMP Cerro Verde	2015	AT_11_01_15_12.20_IV	Atlantic
Uruguay	ACMP Cerro Verde	2015	AT_11_01_15_12.25_IV	Atlantic
Uruguay	ACMP Cerro Verde	2015	AT_11_01_15_12.40_IV	Atlantic
Uruguay	ACMP Cerro Verde	2015	AT_11_01_15_12.50_IV	Atlantic
Uruguay	ACMP Cerro Verde	2015	AT_03_01_15_10.26_PE	Atlantic
Uruguay	ACMP Cerro Verde	2015	AT_05_03_15_15.40_CV	Atlantic
Uruguay	ACMP Cerro Verde	2015	AT_09_03_15_10.24_PE	Atlantic
Uruguay	ACMP Cerro Verde	2015	AT_10_02_15_16.02_PE	Atlantic
Uruguay	ACMP Cerro Verde	2015	AT_11_01_15_15.09_PE	Atlantic
Uruguay	ACMP Cerro Verde	2015	AT_11_01_15_15.15_PE	Atlantic
Uruguay	ACMP Cerro Verde	2015	AT_19_01_15_10.37_PE	Atlantic
Uruguay	ACMP Cerro Verde	2015	AT_19_01_15_10.46_PE	Atlantic
Uruguay	ACMP Cerro Verde	2015	AT_19_01_15_11.36_PE	Atlantic
Uruguay	ACMP Cerro Verde	2015	AT_19_01_15_12.32_PE	Atlantic
Uruguay	ACMP Cerro Verde	2015	AT_19_01_15_15.14_PE	Atlantic
Uruguay	ACMP Cerro Verde	2015	AT_26_01_15_10.52_PE	Atlantic
Uruguay	ACMP Cerro Verde	2015	AT_26_01_16_14.58_PE	Atlantic
Uruguay	ACMP Cerro Verde	2016	AT_08_03_16_11.27_CV	Atlantic
Uruguay	ACMP Cerro Verde	2016	AT_08_03_16_11.53_CV	Atlantic
Uruguay	ACMP Cerro Verde	2016	AT_08_03_16_16.07_CV	Atlantic
Uruguay	ACMP Cerro Verde	2016	AT_08_03_16_16.14_CV	Atlantic
Uruguay	ACMP Cerro Verde	2016	AT_08_03_16_16.35_CV	Atlantic
